# Supplementary material for: Gene Expression Classifier Reveals Prognostic Osteosarcoma Microenvironment Molecular Subtypes
Source: PubMed Central journal article supplement (PMC8093635; doi:10.3389/fimmu.2021.623762), 2021-04-20
Supplement: DataSheet_1.pdf [file DataSheet_1.pdf]

**Table S1:** Clinical characteristics of patients in TARGET program osteosarcoma project.

| Characteristics         | Factor                                | Group | Count | Percent |
|-------------------------|---------------------------------------|-------|-------|---------|
| Gender                  | Female                                | F     | 39    | 42.39%  |
|                         | Male                                  | M     | 53    | 57.61%  |
| Diagnosis               | Metastatic status at diagnosis        | Met   | 22    | 23.91%  |
|                         | Non-metastatic                        | None  | 70    | 76.09%  |
| Overall<br>Survival, OS | $\geq 1825$ days (5 year)             | Good  | 29    | 31.52%  |
|                         | $< 1825$ & $\geq 730$ days (2~5 year) | Medi  | 32    | 34.78%  |
|                         | $< 730$ days (2 year)                 | Poor  | 31    | 33.70%  |
| Response                | Necrosis $\geq 90\%$ or Stage 3/4     | Good  | 21    | 22.83%  |
|                         | Necrosis $< 90\%$ or Stage 1/2        | Poor  | 28    | 30.43%  |
|                         | No histologic information             | None  | 43    | 46.74%  |

**Table S2.** Clinicopathological characteristics of 47 osteosarcoma patients.

| Characteristics         | Factor    | Count | Percentage (%) |
|-------------------------|-----------|-------|----------------|
| Age (years)             | $\leq 10$ | 6     | 12.7           |
|                         | 10 - 18   | 31    | 66.0           |
|                         | $18 \leq$ | 10    | 21.3           |
| Gender                  | Male      | 28    | 59.6           |
|                         | Female    | 19    | 40.4           |
| Enneking                | IIB       | 27    | 57.4           |
|                         | III       | 20    | 42.6           |
| Lung or Bone metastasis | Yes       | 21    | 44.7           |
|                         | No        | 26    | 55.3           |
| Treatment response      | PR        | 15    | 31.9           |
|                         | SD        | 15    | 31.9           |
|                         | PD        | 15    | 31.9           |
|                         | NA        | 2     | 4.3            |
